# Supplementary material for: [Retracted] Adropin Inhibits Vascular Smooth Muscle Cell Osteogenic Differentiation to Alleviate Vascular Calcification via the JAK2/STAT3 Signaling Pathway
Source: Hindawi journal article supplement (doi:10.1155/2022/9122264), 2022-01-01
Supplement: f1 [file 9122264.f1.doc]

**Supplementary Table S1.** Antibodies table.

| **Reagent** | **Source** | **Identifier** |
| --- | --- | --- |
| **Used for western blot analysis** | | |
| ***Primary antibodies*** | | |
| Anti-Adropin antibody, rabbit monoclonal | Abcam | ab279716 |
| Anti-Adropin antibody, mouse monoclonal | R&D Systems | MAB9690 |
| Anti-BMP2 antibody, rabbit monoclonal | Abcam | ab284387 |
| Anti-ALP antibody, rabbit polyclonal | Abcam | ab229126 |
| Anti-ALP antibody, mouse monoclonal | Santa Cruz | sc-365765 |
| Anti-Osteoprotegerin antibody, rabbit polyclonal | Abcam | ab73400 |
| Anti-Osteocalcin antibody, rabbit monoclonal | Abcam | ab133612 |
| Anti-Osteocalcin antibody, mouse monoclonal | Santa Cruz | sc-365797 |
| Anti-Runx2 antibody, rabbit monoclonal | Abcam | ab236639 |
| Anti-p-JAK2 antibody, rabbit monoclonal | Cell Signaling Technology | #3771 |
| Anti-JAK2 antibody, rabbit monoclonal | Cell Signaling Technology | #3230 |
| Anti-p-STAT3 antibody, rabbit monoclonal | Cell Signaling Technology | #12640 |
| Anti-STAT3 antibody, rabbit monoclonal | Cell Signaling Technology | #9145 |
| Anti-SM22 antibody, rabbit polyclonal | Abcam | ab155272 |
| Anti-α-SMA antibody, rabbit monoclonal | Abcam | ab108424 |
| Anti-GAPDH antibody, rabbit polyclonal | Abcam | ab8245 |
| ***Secondary antibodies*** | | |
| Goat Anti-Rabbit IgG H&L (HRP) | Abcam | ab97051 |
| Goat Anti-mouse IgG H&L (HRP) | Abcam | ab6789 |
| **Used for immunofluorescence** | | |
| ***Primary antibodies*** | | |
| Anti-Adropin antibody, mouse monoclonal | R&D Systems | MAB9690 |
| ***Secondary antibodies*** | | |
| Goat Anti-Mouse IgG H&L (Alexa Fluor® 488) | Abcam | ab150113 |

**Supplementary Table S2.** Primers used for PCR.

| **Gene** | **Forward** | **Reverse** |
| --- | --- | --- |
| Adropin | TCGTTGTGTGTGGACAGGAC | GGCAGACTGAATGCAGGGAT |
| BMP2 | ACTCGAAATTCCCCGTGACC | CCACTTCCACCACGAATCCA |
| ALP | CTGGATCCTGTTGACACCCC | GGCACTTCTTGAAAGCCTGC |
| OPG | CTGGAACCCCAGAGCGAAAT | GCGTTTACTTTGGTGCCAGG |
| OCN | CATGAGAGCCCTCACACTCC | CTCCTGAAAGCCGATGTGGT |
| Runx2 | CGCCTCACAAACAACCACAG | TCACTGTGCTGAAGAGGCTG |
| GAPDH(h) | AATGGGCAGCCGTTAGGAAA | GCGCCCAATACGACCAAATC |
| GAPDH(r) | GCATCTTCTTGTGCAGTGCC | GATGGTGATGGGTTTCCCGT |
